# Supplementary material for: Adhesion-based simple capture and recovery of circulating tumor cells using a blood-compatible and thermo-responsive polymer-coated substrate
Source: Royal Society of Chemistry journal article supplement (doi:10.1039/c6ra15229e), 2016-01-01
Supplement: c6ra15229e1.pdf [file c6ra15229e1.pdf]

(A) PMEA

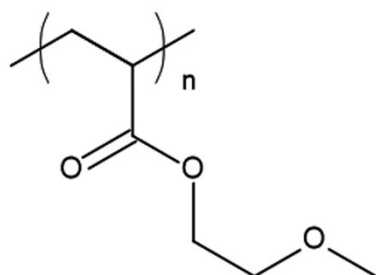

(B) P(Et2A-Me2MA)

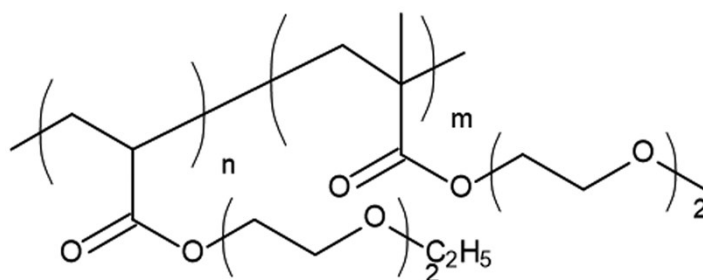

(C) PMPC

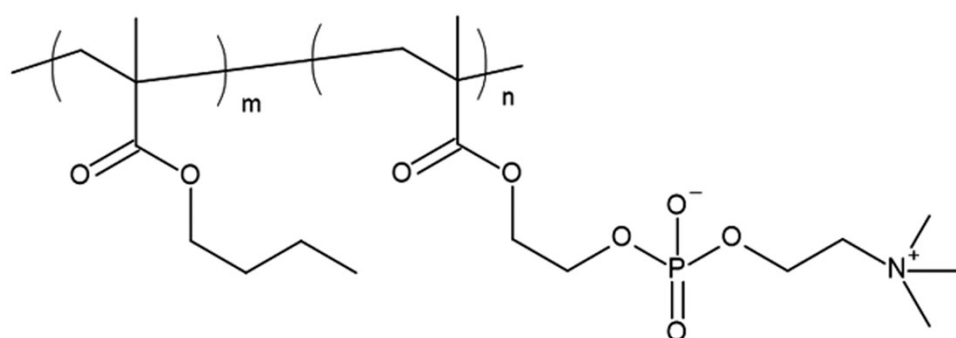

Supplemental Figure S1. Chemical structures of PMEA, P(Et2A-Me2MA), and PMPC.

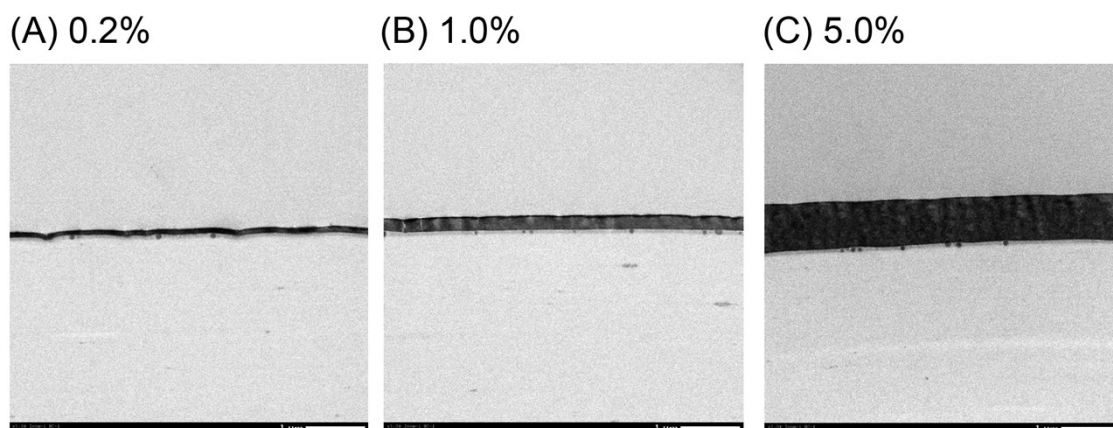

Supplemental Figure S2. Sectional transmission electron microscope (TEM) images of the substrates coated with P(Et2A-Me2MA) at different concentrations. TEM observation was outsourced and the images were obtained by Nitto Analytical Techno-center (Osaka, Japan).

**Supplemental Table S1. Detachment ratio of HT-1080 cells from PEt2A**

| Polymer | Detachment ratio (%) |
|---------|----------------------|
| PET     | 26.5±7.0             |
| PMEA    | 25.0±8.0             |
| PEt2A   | 13.8±23.0            |

PMEA and PEt2A were coated at a concentration of 1.0 wt%. The cells were incubated at 10°C for 90 min.
